# Supplementary material for: Antiviral activity of sertindole, raloxifene and ibutamoren against transcription and replication-competent Ebola virus-like particles
Source: PubMed Central journal article supplement — BMB Rep. 2020 Mar 31;53(3):166–71. doi: 10.5483/BMBRep.2020.53.3.175 (PMC7118351; doi:10.5483/bmbrep.2020.53.3.175), 2020-03-31
Supplement: BMB-53-166_Supple.pdf [file BMB-53-166_Supple.pdf]

**Manuscript Type: Article**

**Title:** Antiviral activity of sertindole, raloxifene and ibutamoren against transcription and replication-competent Ebola virus-like particles

**Author's name:** Yi-Seul Yoon<sup>1,†</sup>, Yejin Jang<sup>1</sup>, Thomas Hoenen<sup>2</sup>, Heegwon Shin<sup>3</sup>,  
Younghoon Lee<sup>3</sup> and Meehyein Kim<sup>1,\*</sup>

**Affiliation:** <sup>1</sup>Virus Research Group, Korea Research Institute of Chemical Technology (KRICT), Daejeon 34114, Republic of Korea, <sup>2</sup>Institute for Molecular Virology and Cell Biology, Friedrich-Loeffler-Institut, Greifswald-Insel Riems, Germany, <sup>3</sup>Department of Chemistry, Korea Advanced Institute of Science and Technology (KAIST), Daejeon 34141, Republic of Korea

<sup>†</sup>Present address: Center for Alternatives to Animal Testing, Korea Testing and Research Institute, Hwasun-gun, Jeollanam-do 58141, Republic of Korea

**Running Title:** Antiviral compound screening against Ebola virus

**Keywords:** Ebola virus, Antiviral, Sertindole, Raloxifene, Ibutamoren

**Corresponding Author's Information:** Tel: +82-42-860-7540; Fax: +82-42-860-7400; E-mail: mkim@kRICT.re.kr

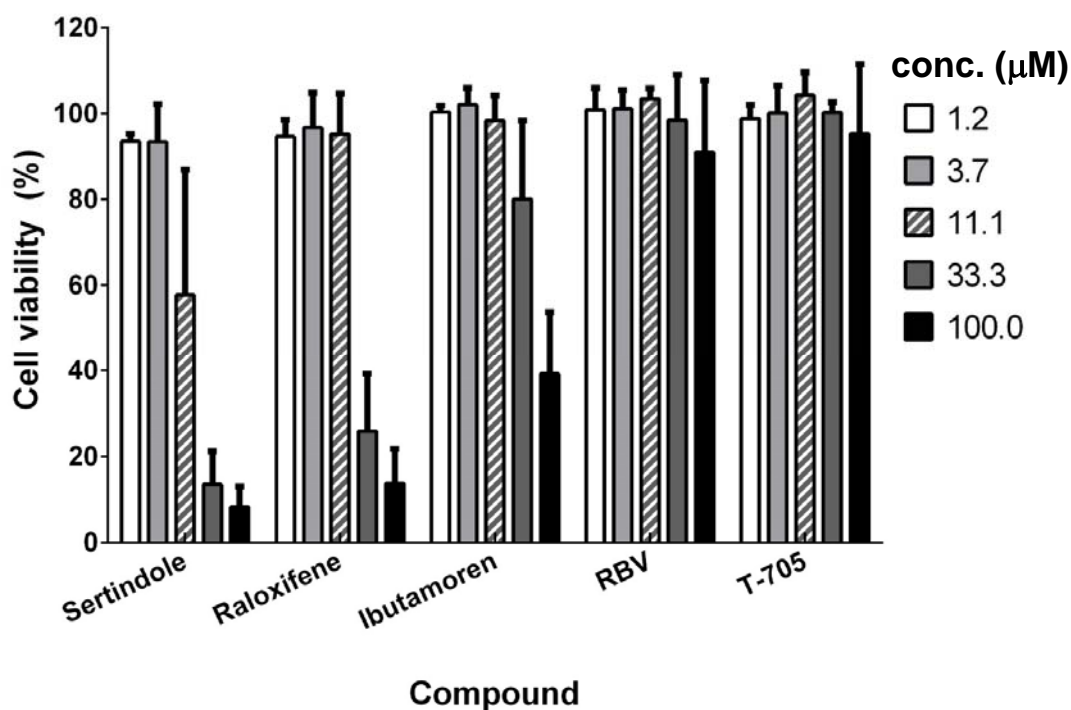

**Supplementary Fig. S1. MTT-based cell viability assay.** HEK293T cells in 96-well plates were treated with increasing concentrations of sertindole, raloxifene, itubamoren, RBV or T705. On the next day, the cell viability was measured by addition of 50  $\mu$ l of 2.5 mg/ml MTT at 37°C for 1 h and 100  $\mu$ l of MTT solvent (0.1 N HCl and 10% Triton X-100 in isopropanol). The absorbance was read at 540 nm with a reference filter at 690 nm using a SpectraMax M3 Microplate Reader (Molecular Devices).

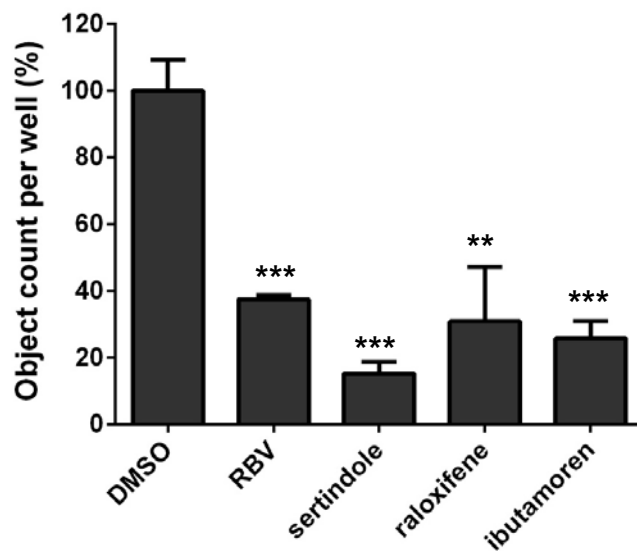

**Supplementary Fig. S2. Relative occupancy of EBOV GP-derived fluorescence.** Wide-field fluorescence microscopy was used to count GP-positive cells treated with 0.2% DMSO vehicle, 100  $\mu$ M RBV, 10  $\mu$ M sertindole, 10  $\mu$ M raloxifene or 10  $\mu$ M ibutamoren. The slides used in Figure 3B were examined using a wide-field fluorescent imaging system (IncyCyte Software; Essen BioScience) prior to nuclear counterstaining. The number of the green fluorescent objects with intensities  $\geq 15$  AU was counted by collecting 36 nonoverlapping images per well in triplicate for each sample. Percentage object counts were analyzed in triplicate using the DMSO-treated sample as a control. \*\*,  $P < 0.01$ ; \*\*\*,  $P < 0.001$ .

**Group I: diphenylmethane derivatives**

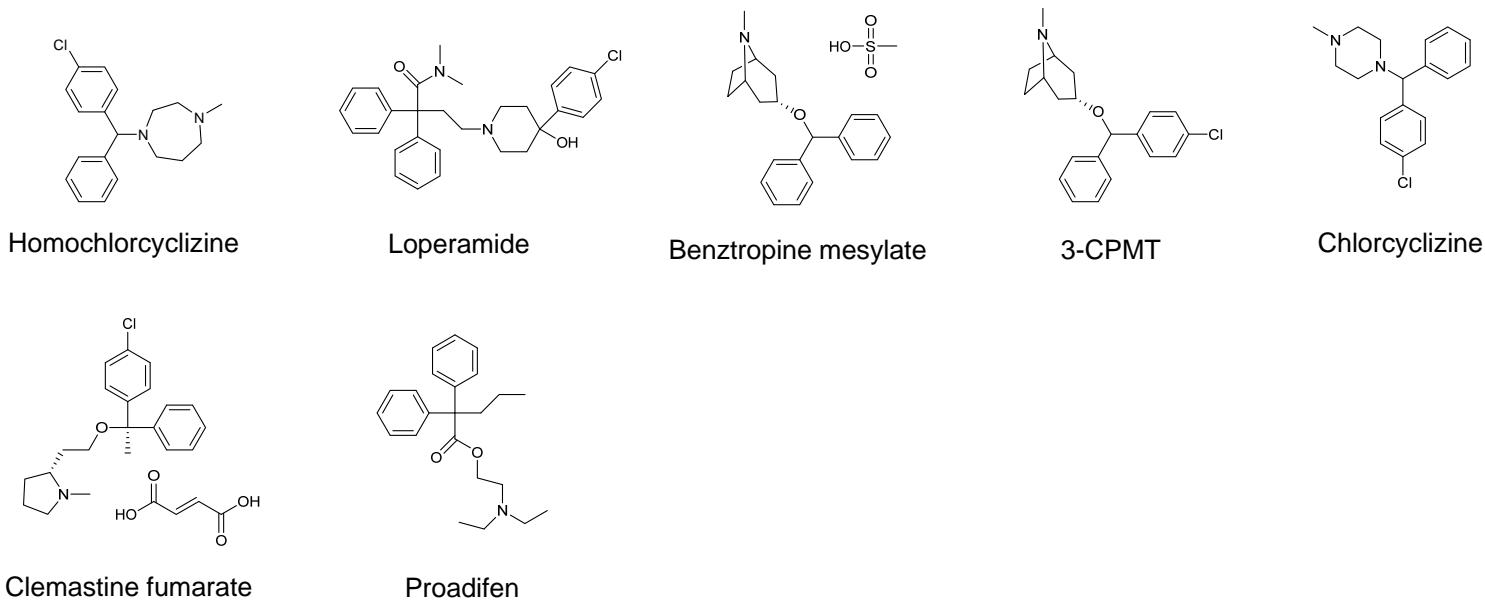

**Group II: promazine derivatives**

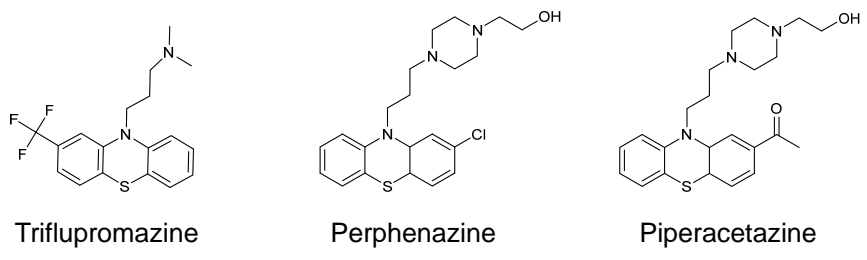

**Group III: others**

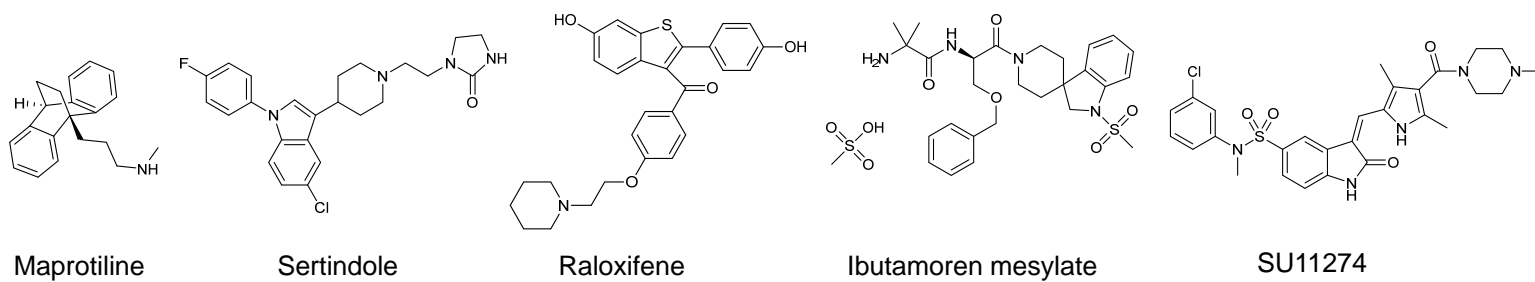

**Supplementary Fig. S3. Chemical structure-based classification of the 15 hit compounds against EBOV.**
